# Supplementary material for: Photochemical anti–syn isomerization around the –N–N bond in heterocyclic imines
Source: Royal Society of Chemistry journal article supplement (doi:10.1039/c9ra10730d), 2020-01-01
Supplement: c9ra10730d1.pdf [file c9ra10730d1.pdf]

## SC Advances (Electronic Supplementary Information)

### Photochemical *anti-syn* isomerization around the –N=N= bond in heterocyclic imines

Michal Hricovíni,<sup>a</sup> James Asher<sup>b</sup> and Miloš Hricovíni<sup>\*c</sup>

*Institute of Chemistry, Slovak Academy of Sciences, Dúbravská cesta 9, 845 38 Bratislava, Slovak Republic.*

*Institute of Inorganic Chemistry, Slovak Academy of Sciences, Dúbravská cesta 9, 845 36 Bratislava, Slovak Republic.*

*Institute of Chemistry, Slovak Academy of Sciences, Dúbravská cesta 9, 845 38 Bratislava, Slovak Republic. E-mail: milos.hricovini@savba.sk; Fax: +421-2-594 0222; Tel: +421-2-59510323.*

#### SUPPLEMENTARY INFORMATION S1: ADDITIONAL COMPUTATIONAL RESULTS

The computational methods used will be abbreviated as in the main paper:

- $\omega$ B97XD/LANL2DZ = WB-L2
- $\omega$ B97XD/6-311++G(2d,2p) = WB-6+
- CCSD//cc-pVDZ = CC-DZ
- CCSD//cc-pVTZ = CC-TZ

These will be combined either with PCM or SMD to simulate the DMSO solvent environment. Additionally, CASSCF will also be used, primarily to examine excited states. The details are as follows.

CASSCF calculations were performed in OpenMolcas with PCM (SMD was not available). The cc-pVTZ basis was used. Natural orbitals from a UHF calculation, with the IVO keyword for improved virtual orbitals, were used as a starting point. The calculation then gradually expanded the active space, in the sequence CAS[4,4], CAS[6,8], CAS[8,12]. State-averaging was performed over the first three states (GS, ES1, ES2). The structure of the molecule was not reoptimised; the structures were taken from the WB-6+ optimizations.

Generally, the excited-state calculations were highly sensitive to the choice of active space.

#### 1. BENCHMARKING

##### 1.1 Model 1 (M1)

**Table S1.** Properties of the potential energy curve of **M1**, calculated at different levels of theory. Energies are in kJ/mol. "Barrier" refers to the energy maximum. CAS[8,12] calculations use geometries optimised with WB-6+; in all other cases, energies given are from optimization of both electronic and molecular structure with the specified method.

| Property:              | WB-L2 |      | WB-6+ |      | CC-DZ |      | CC-TZ |      |
|------------------------|-------|------|-------|------|-------|------|-------|------|
|                        | PCM   | SMD  | PCM   | SMD  | PCM   | SMD  | PCM   | SMD  |
| $E_{syn}-E_{anti}$     | 1.6   | 3.9  | 7.9   | 10.5 | 7.1   | 9.3  | 7.4   | 9.8  |
| $E_{barrier}-E_{syn}$  | 26.0  | 24.3 | 18.0  | 15.6 | 18.6  | 15.5 | 18.4  | 16.2 |
| $E_{barrier}-E_{anti}$ | 27.6  | 28.2 | 25.9  | 26.1 | 25.7  | 24.7 | 25.8  | 26.0 |
| barrier angle          | 103°  | 104° | 109°  | 107° | 109°  | 106° | 106°  | 104° |

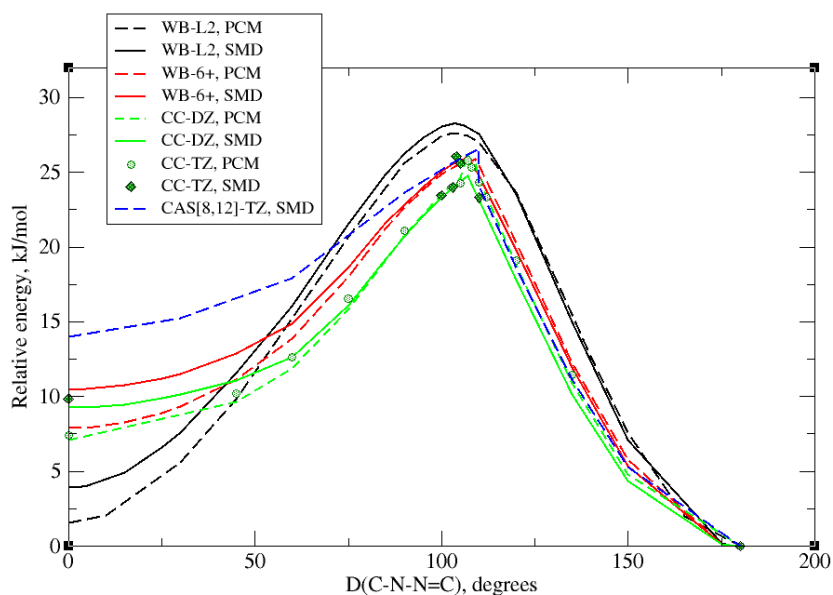

**Figure S1.** Potential energy curves of **M1**, calculated at different levels of theory (with geometry also optimized at the specified level of theory, except for CAS[8,12]-TZ, PCM, which used molecular geometries from WB-6+/SMD). The energy is plotted relative to that of the *anti*-form ( $180^\circ$ ).

We note here that the ground-state energy curve consists of two intersecting curves distinguished by the  $D(\text{H-N-N=C})$  dihedral angle. At *syn*, this angle is  $180^\circ$ , but it decreases to about  $104^\circ$  with increasing  $D(\text{C-N-N=C})$ . At *anti*, this angle is  $0^\circ$ , but it increases to about  $70^\circ$  with decreasing  $D(\text{C-N-N=C})$ . The two energy curves cross at  $D(\text{C-N-N=C}) = 107^\circ$ . However, there is a small energy barrier of 0.9 kJ/mol between these two curves at  $107^\circ$ ; for this reason, simply plotting the lowest energy possible for a given  $D(\text{C-N-N=C})$  dihedral angle (as in Fig. S1) does not capture the whole of the energy barrier. (Or, put differently, the dihedral angle is not *exactly* the same as the reaction coordinate for *anti-syn* isomerization, merely a close approximation to it.) Fig. S2 shows the two structures at  $107^\circ$ , as well as the energy curve (WB-6+ level).

It should also be noted that, although these two curves meet at  $107^\circ$  for the ground-state energy, they are not guaranteed to meet here (or anywhere else) for any other properties calculated from the geometries for these two curves. Thus, kinks and discontinuities may occur in vertical excitation energy curves, as well as in cases where the electronic structure and molecular geometry are optimised using different methods or levels of theory.

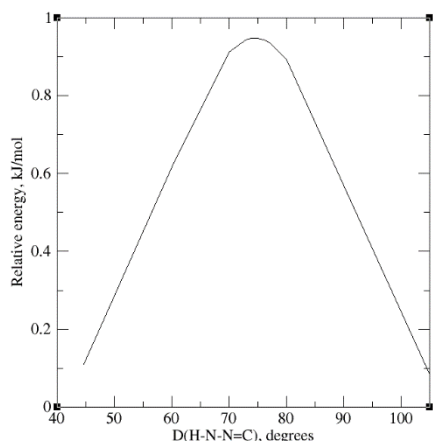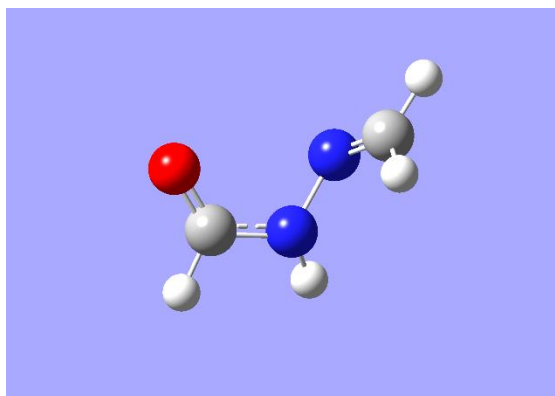

**Figure S2.** Details of the transition state. Left: potential energy curve of **M1** for transition between the two parts of the WB-6+ curves at  $107^\circ$ . Right: **M1** at  $107^\circ$ , coming from *anti*-conformation.

## 1.2 Model 2 (M2)

**Table S2.** Properties of the potential energy curve of **M2**, calculated at different levels of theory. Energies are in mH; angles are in degrees. “Barrier” refers to the smaller energy maximum.

| Property:                            | WB-L2 |       | WB-6+ |       | CC-DZ |
|--------------------------------------|-------|-------|-------|-------|-------|
|                                      | PCM   | SMD   | PCM   | SMD   | SMD   |
| $E_{\text{syn}}-E_{\text{anti}}$     | -1.4  | -0.5  | 6.1   | 6.6   | 1.2   |
| $E_{\text{barrier}}-E_{\text{syn}}$  | 20.7  | 18.6  | 11.1  | 9.0   | 10.3  |
| $E_{\text{barrier}}-E_{\text{anti}}$ | 19.3  | 18.0  | 17.2  | 15.5  | 11.5  |
| <i>syn</i> - angle                   | 6°    | 6°    | 15°   | 51°   | 57°   |
| <i>anti</i> - angle                  | -170° | -172° | -171° | -170° | -169° |
| barrier angle                        | 117°  | 120°  | 120°  | 121°  | 153°  |

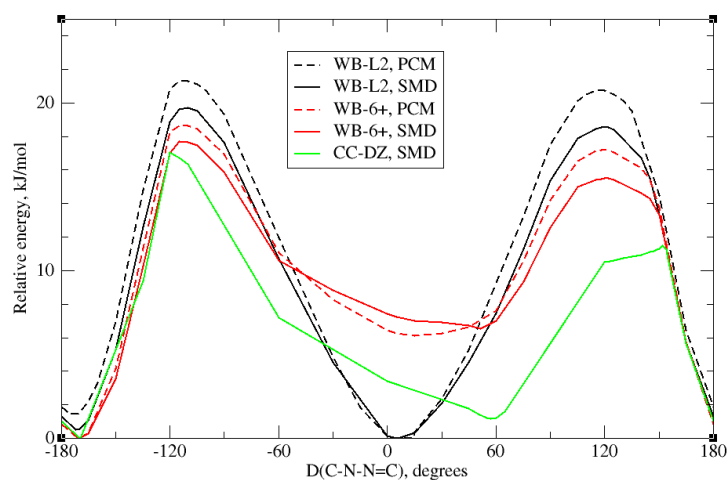

**Figure S3.** Potential energy curves of **M2**, calculated at different levels of theory. Energy relative to the lowest point on the curve.

## 1.3 Model 4 (M4)

**Table S3.** Properties of the potential energy curve of **M4**, calculated at different levels of theory. Energies are in kJ/mol; angles are in degrees. There are two barriers of interest (cf. Figure S3, below): “barrier<sub>1</sub>” is at 0°, “barrier<sub>2</sub>” is at ~125-140°.

| Property:                             | WB-L2 |      | WB-6+ |      | CC-DZ |      |
|---------------------------------------|-------|------|-------|------|-------|------|
|                                       | PCM   | SMD  | PCM   | SMD  | PCM   | SMD  |
| $E_{\text{syn}}-E_{\text{anti}}$      | -1.93 | 0.4  | 2.6   | 2.9  | -2.0  | -1.6 |
| $E_{\text{barrier}_1}-E_{\text{syn}}$ | –     | –    | 2.6   | 4.6  | 1.9   | 3.8  |
| $E_{\text{barrier}_2}-E_{\text{syn}}$ | 14.0  | 11.7 | 6.6   | 6.1  | 9.4   | 8.6  |
| <i>syn</i> - angle                    | 0°    | 0°   | 65°   | 67°  | 62°   | 66°  |
| barrier <sub>2</sub> angle            | 128°  | 128° | 135°  | 136° | 142°  | 142° |

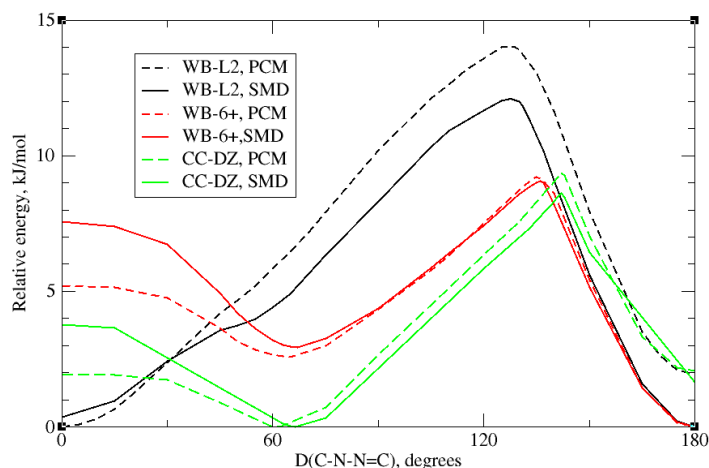

Figure S4. Potential energy curves of **M4**, calculated at different levels of theory.

## 1.4 Comments

For energy differences between *syn* and *anti*, neither WB-L2 nor WB-6+ consistently agree with CC-DZ; WB-6+ gives good results for **M1** but the *syn* form is about 2 mH too high (or *anti*, 2 mH too low) for **M2** and **M3**. For the energy barriers at  $\sim 105\text{-}135^\circ$ , WB-L2 consistently overestimates the height of the barrier, while WB-6+ does better.

The peak/shoulder at  $0^\circ$  for **M2** and **M4** is present at the coupled-cluster level; WB-L2 consistently fails to produce it, producing a curve that looks qualitatively different. WB-6+ with PCM underestimates this effect (too small a peak for **M4**, *syn*-angle too close to  $0^\circ$  for **M2**), but a slight shoulder is visible; WB-6+ with SMD gives a *syn*-angle close to CC-DZ for **M2** and **M4**, and for the latter also gives a similar height of the  $0^\circ$  energy maximum.

## 2. EXCITED STATES

### 2.1 Model 1 (**M1**)

Figure S5 below shows the unadjusted energy curves for **M1**'s ground state and first four excited states, calculated at WB-6+/SMD level. For reasons discussed above, the excited state energies have a discontinuity around  $107^\circ$ . The curves discussed in this section are vertical excitation energies; attempts to optimize the first two excited states (at WB-6+/SMD level) lead to extremely small energy gaps, and usually swapping of states, indicating conical intersections.

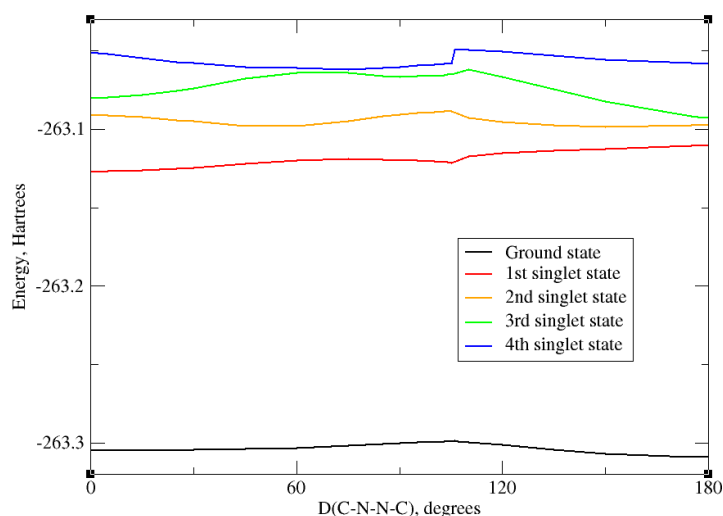

Figure S5. Unadjusted energy curves for **M1**: ground and excited states (vertical excitation energy curves), calculated using TD-DFT at the WB-6+, SMD level.

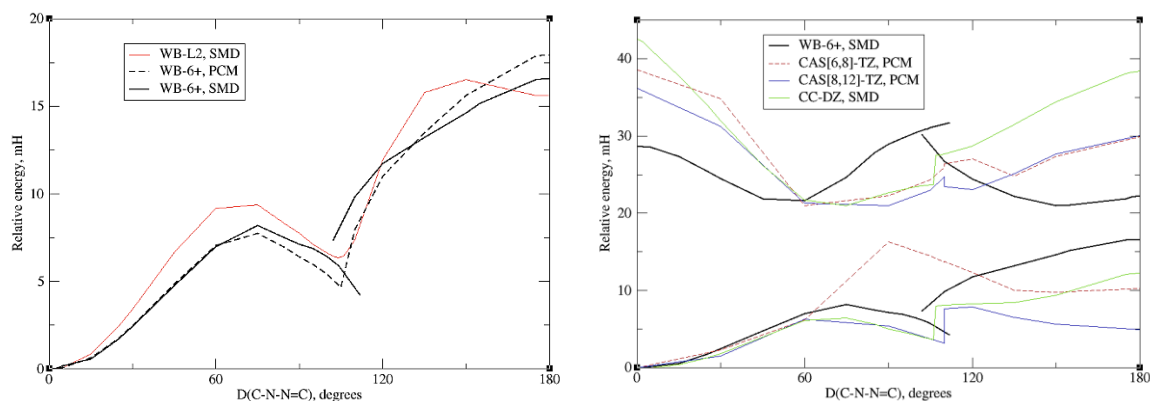

**Figure S6.** Vertical excitation energy curve for the first singlet excited state of **M1**, calculated at different levels of theory. Energy relative to syn-form ( $0^\circ$ ). (Left) ES1, comparison of TD-DFT methods. (Right) ES1 and ES2, comparison of TD-DFT (WB-6+) with CAS-SCF and EOM-CCSD (CC-DZ); ES2 shifted by an arbitrary amount for clarity.

Figure S6 compares vertical excitation energy curves for different methods. For ES1, WB-6+ and EOM-CCSD predict a downhill slope away from the *anti*-conformer ( $180^\circ$ ), whereas CASSCF predicts an uphill slope; for ES2, the curve slopes downhill from the *anti*-conformer according to all methods, but TD-DFT finds this extends only to about  $150^\circ$ , whereas CASSCF finds it to be downhill to  $120$ - $135^\circ$  (and EOM-CCSD finds it to extend still further).

The shapes of the vertical excitation energy curves are similar for TD-DFT, CASSCF and EOM-CCSD. However, examination of the first three excitations (for the *anti*-conformer) reveals that the character of the states is slightly different. For TD-DFT and CASSCF, the three excitations (in order) are HOMO-1 to LUMO; HOMO to LUMO; and HOMO-2 to LUMO. (For CASSCF, this was checked against CI-only calculations.) However, for EOM-CCSD, the second and third excited state are swapped around. Curiously, this does not seem to make much difference to the excitation energy curves for ES2 or ES3 (not shown).

In line with this, TD-DFT finds significant oscillator strength only for the 2<sup>nd</sup> excitation, whereas EOM-CCSD finds it only for the 3<sup>rd</sup> excitation. CAS[8,12], meanwhile, finds no significant oscillator strengths for the first three excitations.

**Table S4.** Excitation energies and oscillator strengths for **M1** at various levels of theory (*anti*-form). Calculated at TD-DFT (for WB-L2, WB-6+) or EOM-CCSD (for CC-DZ) level. CAS[8,12] results used state-averaging over the first 5 states; oscillator strengths given are dipole transition strengths, with velocity transition strengths given in brackets where different.

| Excited state | Excitation energies |            |            |            |            | Oscillator strength |            |            |            |            |
|---------------|---------------------|------------|------------|------------|------------|---------------------|------------|------------|------------|------------|
|               | WB-L2, SMD          | WB-6+, PCM | WB-6+, SMD | CC-DZ, SMD | CAS [8,12] | WB-L2, SMD          | WB-6+, PCM | WB-6+, SMD | CC-DZ, SMD | CAS [8,12] |
| 1             | 5.16                | 5.45       | 5.40       | 5.66       | 5.57       | 0.002               | 0.002      | 0.002      | 0.002      | 0.00       |
| 2             | 5.62                | 5.83       | 5.76       | 6.31       | 6.37       | 0.487               | 0.484      | 0.480      | 0.003      | 0.01(0.03) |
| 3             | 5.72                | 5.90       | 5.89       | 6.47       | 8.02       | 0.000               | 0.000      | 0.000      | 0.475      | 0.01       |

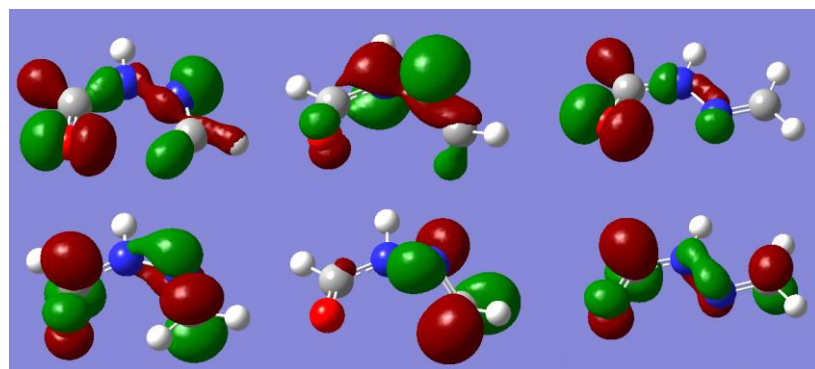

**Figure S7.** Natural Transition Orbitals (NTOs) for **M1**, first singlet excited state. Top row: Hole orbital. Bottom row: Excited orbital. Left:  $0^\circ$ . Middle:  $90^\circ$ . Right:  $180^\circ$ . Isosurface value:  $10^{-1.19}$ .

## 2.2 Model 2 (M2)

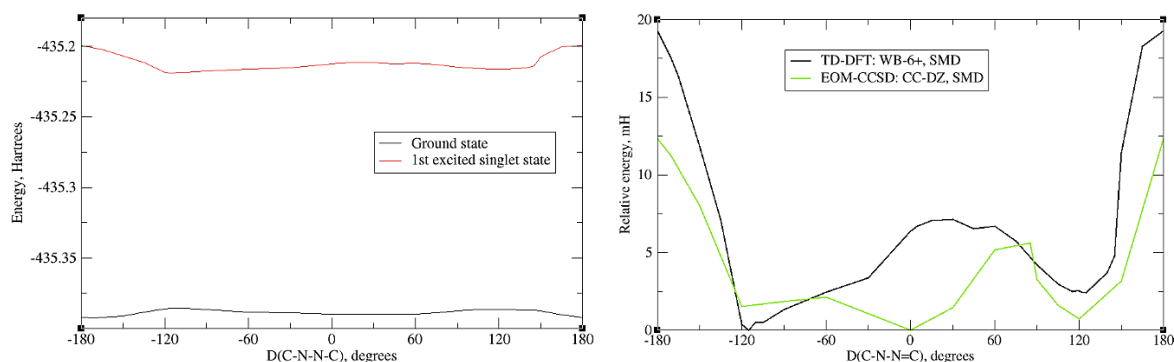

**Figure 8** : (Left) unadjusted vertical excitation energy curves for **M2**: ground-state (GS), excited state 1 (ES1), calculated with TD-DFT: WB-6+; (Right) vertical excitation energy curves for **M2**, ES1, comparison of TD-DFT and EOM-CCSD.

**Table S5**. Excitation energies and oscillator strengths for **M2** ( $-170^\circ$ ).

| Excited state | WB-6+, SMD          |                     |
|---------------|---------------------|---------------------|
|               | Excitation energies | Oscillator strength |
| 1             | 5.20                | 0.035               |
| 2             | 5.51                | 0.248               |
| 3             | 5.80                | 0.186               |

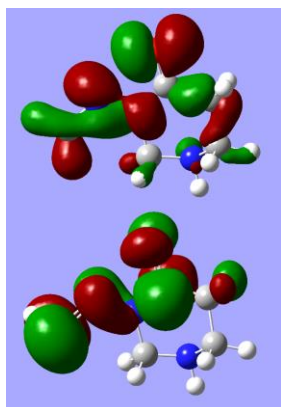

**Figure S9**. Natural Transition Orbitals for **M2**, anti-conformer ( $180^\circ$ ). Isosurface value: 0.03.

## 2.3 Model 3 (M1), S1

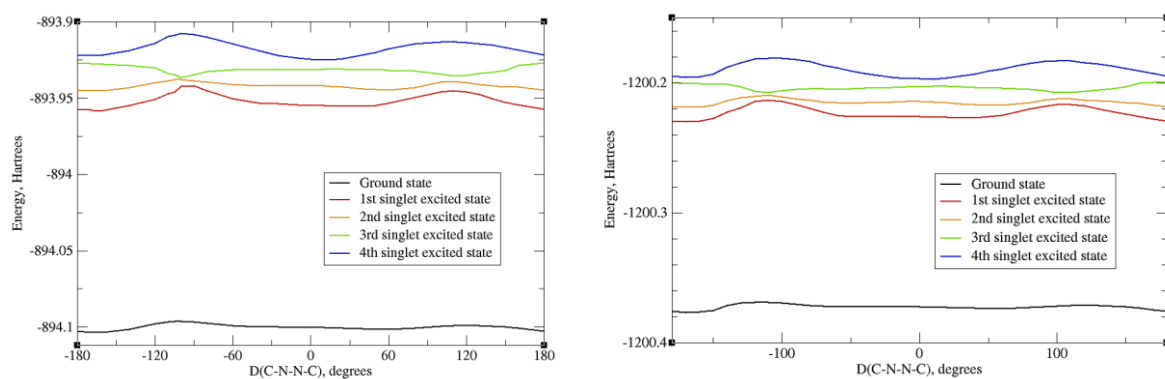

**Figure S10**. Unadjusted energy curves for **M3** (top), **S1** (bottom) for ground and excited states, calculated using TD-DFT at the WB-6+, SMD level.

**Table S6.** Excitation energies and transition probabilities for M3 and S1 (-170°), calculated using TD-DFT at the WB-6+, SMD level.

| Excitation: | Excitation energy |           | Oscillator strength |           |
|-------------|-------------------|-----------|---------------------|-----------|
|             | <b>M3</b>         | <b>S1</b> | <b>M3</b>           | <b>S1</b> |
| 1           | 3.96              | 3.99      | 0.533               | 0.478     |
| 2           | 4.31              | 4.29      | 0.223               | 0.236     |
| 3           | 4.79              | 4.79      | 0.279               | 0.295     |
| 4           | 4.93              | 4.92      | 0.025               | 0.016     |
